# Supplementary material for: WNT5a-ROR Signaling Is Essential for Alveologenesis
Source: PubMed Central journal article supplement (PMC7072327; doi:10.3390/cells9020384), 2020-02-07
Supplement: cells-09-00384-s001.pdf [file cells-09-00384-s001.pdf]

# WNT5a-ROR Signaling Is Essential for Alveologenesis

## Supplementary Materials:

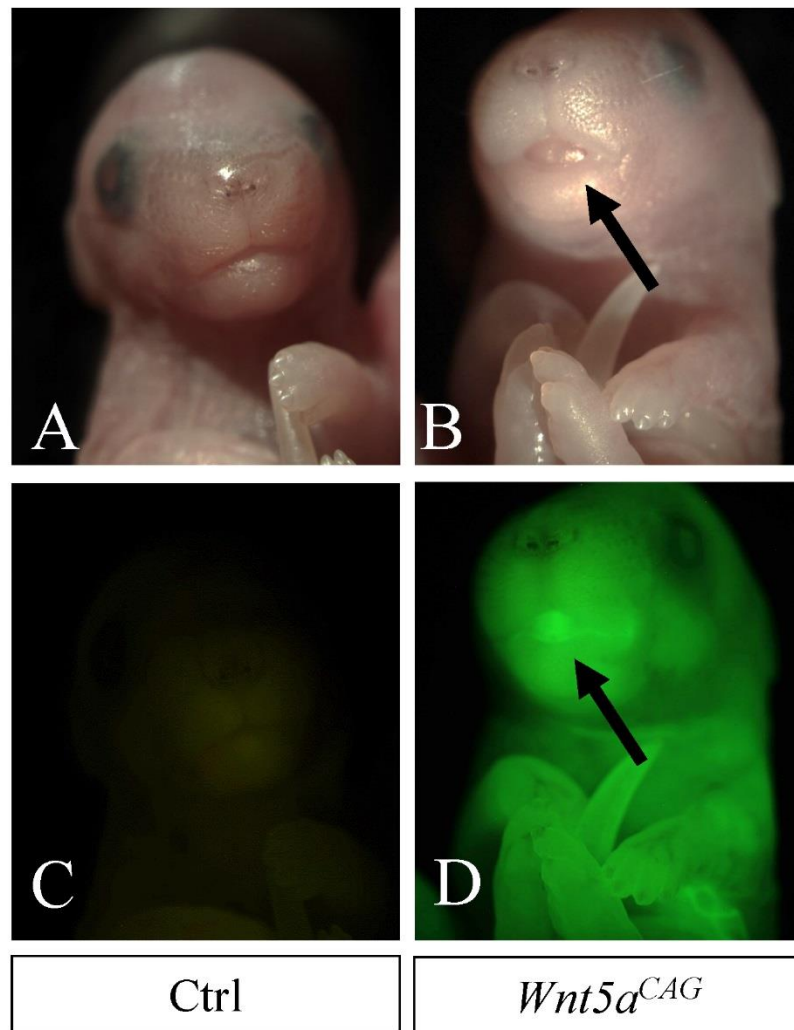

**Figure S1:** Craniofacial defects of E18 *Wnt5a*<sup>CAG</sup> embryos.

A-D: Frontal view of E18 control (A, C) and *Wnt5a*<sup>CAG</sup> (B, D) craniofacial phenotype. Panels A & B show the bright field images and Panels C & D show the green fluorescent images of control and *Wnt5a*<sup>CAG</sup> embryos, respectively. Arrow indicates the “open” mouth phenotype in *Wnt5a*<sup>CAG</sup>.

**Table S1:** Expression of cell type specific markers during saccular and alveolar phases of lung development.

Saccular phase cell specificity is based on mouse E18.5 scRNA-seq in LungGENS (LungGENS: <https://research.cchmc.org/pbge/lunggens>). Alveolar phase cell specificity is based on mouse P7 scRNA-seq in LungGENS for endothelial and myofibroblast markers, and publications [32,41,42] listed in the table for AT1 and AT2 markers.

| Gene Symbol  | Gene Name                                            | Saccular Phase          | Alveolar Phase (reference) |
|--------------|------------------------------------------------------|-------------------------|----------------------------|
| Aqp5         | Aquaporin 5                                          | AT1                     | AT1 (32)                   |
| Cav1         | Caveolin 1                                           | AT1, EC                 | AT1 (42)                   |
| Emp2         | Epithelial Membrane Protein 2                        | AT1                     | AT1 (42)                   |
| Hopx         | HOP Homeobox                                         | AT1                     | AT1 (32)                   |
| Rage (Ager)  | Advanced Glycosylation End-Product Specific Receptor | AT1                     | AT1 (42)                   |
| Rtkn2        | Rhotekin 2                                           | AT1, Ciliated Cells     | AT1 (42)                   |
| Pdpn         | Podoplanin                                           | AT1                     | AT1 (32)                   |
| Sftpc        | Surfactant Protein C                                 | AT2                     | AT2 (32)                   |
| Sftpb        | Surfactant Protein B                                 | AT2                     | AT2 (41)                   |
| Abca3        | ATP Binding Cassette Subfamily A Member 3            | AT2, Club Cells         | AT2 (32)                   |
| Cd31(Pecam1) | Platelet And Endothelial Cell Adhesion Molecule 1    | EC                      | EC                         |
| Emcn         | Endomucin                                            | EC                      | EC                         |
| Flk1 (KDR)   | Kinase Insert Domain Receptor                        | EC, Club Cells          | none                       |
| Tek          | TEK Receptor Tyrosine Kinase                         | EC                      | EC                         |
| Acta2        | Actin Alpha 2, Smooth Muscle                         | MF/SMC                  | MF/SMC                     |
| Tagln        | Transgelin                                           | MF/SMC                  | MF/SMC                     |
| Des          | Desmin                                               | none                    | MF/SMC                     |
| Dbn1         | Drebrin 1                                            | MF/SMC                  | MF/SMC                     |
| Tgfb1        | Transforming Growth Factor Beta Induced              | MF/SMC                  | MF/SMC                     |
| Fbln1        | Fibulin 1                                            | MF/SMC, Ciliated Cells  | MF/SMC                     |
| Eln          | Elastin                                              | MF/SMC, LipoFB/MatrixFB | MF/SMC                     |
| Colla1       | Collagen Type I Alpha 1 Chain                        | LipoFB/MatrixFB         | MatrixFB                   |
| Pdgfra       | Platelet Derived Growth Factor Receptor Alpha        | MF/SMC                  | MF/SMC                     |
| Pdgfrb       | Platelet Derived Growth Factor Receptor Beta         | MF/SMC                  | none                       |

**Abbreviations:** **AT1:** Alveolar epithelial type 1, **AT2:** Alveolar epithelial type 2, **EC:** Endothelial Cells, **MF:** Myofibroblasts, **SMC:** Smooth Muscle Cells, **LipoFB:** Lipofibroblasts, **MatrixFB:** Matrix fibroblasts, **none:**  $-\log(p\text{-value}) < 2.996$  for most differentially expressed cell type.

**Table S2:** Changes of cell migration genes in *Pdgfra* deficient SCMF identified by RNA-seq analysis (GSE126457, [25]).

| Gene  | Fold Changes | P-value   | FDR       |
|-------|--------------|-----------|-----------|
| Actc1 | -7.9         | 0.00E+00  | 0.00E+00  |
| Bmp2  | 2.94         | 4.25E-39  | 2.38E-37  |
| Meox2 | -7.06        | 6.50E-24  | 2.37E-22  |
| Lum1  | -14.74       | 1.55E-40  | 9.06E-39  |
| Cyr61 | 2.27         | 0.00E+00  | 0.00E+00  |
| Cnn1  | -9.68        | 3.57E-168 | 7.53E-166 |
| Fgf18 | -2.22        | 6.32E-04  | 3.96E-03  |

**Table S3:** Antibody information (\*: discontinued).

| Anitbody & Reagents | Company        | Catelog # |
|---------------------|----------------|-----------|
| Mouse anti-GFP      | Santa Cruz, CA | SC-9996   |
| Rabbit anti-ACTA2   | Novus, CO      | NB600531* |
| Rabbit anti-ACTA2   | Millipore, MA  | ABT1487   |
| Goat anti-TAGLN     | Abcam, MA      | AB10135   |
| Rabbit anti-HOPX    | Santa Cruz, CA | SC-30216* |
| Rabbit anti-SFTPC   | Millipore, MA  | AB3786    |
| Hamster anti-PDPN   | DSHB           | 8.1.1     |

**Table S4:** Sequences of real-time RT-PCR primers.

| Gene name (mouse) | realtime RT-PCR Primer Sequences                                       |
|-------------------|------------------------------------------------------------------------|
| Emcn              | 5'-TGC TTC AAG CGA CTG TTC TTT-3'<br>5'-GCC GGT GTT GGA ATA GAG TC-3'  |
| Flk1              | 5'-CAGTGGTACTGGCAGCTAGAA-3'<br>5'-ACAAGCATACGGGCTTGT-3'                |
| Cd31              | 5'-GAGTACGAGGTGAAGGTGCAT-3'<br>5'-CGCCTTCTGTACCTCCTT-3'                |
| Tek               | 5'-CAT AGG AGG AAA CCT GTT CAC-3'<br>5'-GCC CCC ACT TCT GAG CTT-3'     |
| Acta2 (aSMA)      | 5'- CCCACCCAGAGTGGAGAA-3'<br>5'- ACATAGCTGGAGCAGCGTCT-3'               |
| Tagln             | 5'-CCTTCCAGTCCACAAACGAC-3'<br>5'-GTAGGATGGACCTTGTGG-3'                 |
| Desmin (Des)      | 5'-GCG TGA CAA CCT GAT AGA CG-3'<br>5'-TGG AT TCC TCC TGT AGT TTG G-3' |
| Dbn1              | 5'-CCT GCA CCC TTC AAC CAC-3'<br>5'-GAA TAG GAG TGG GTG CCA TC-3'      |
| Tgfb1             | 5'-GCT GCG AGT CTT TGT TTA TCG-3'<br>5'-CCT CTT ATC ATG GGC AGC A-3'   |
| Eln               | 5'-GCTGCTGCTAAGGCTGCTAA-3'<br>5'-AGCACCTGGGAGCCTAACTC-3'               |
| Coll1a1           | 5'-CAT GTT CAG CTT TGT GGA CCT-3'<br>5'-GCA GCT GAC TTC AGG GAT GT-3'  |
| Fbln1             | 5'-GTGCAAGGCTGGCTTCTATP-3'<br>5'-GATAGCGCTGGCACTCGT-3'                 |
| Pdgfra            | 5'-GTCGTTGACCTGCAGTGGAA-3'<br>5'-CCAGCATGGIGATACCTTTGT-3'              |
| Pdgfrb            | 5'-TCAAGCTGCAGGTCAATGTC-3'<br>5'-CCATTGGCAGGGTGTACTC-3'                |
| Ng2               | 5'-CTTGGCCTTGTGGTTCAGAT-3'<br>5'-CACCTCCAGGTGGTTCCTCC-3'               |
| Adrp              | 5'-CCTCAGCTCTCCTGTTAGGC-3'<br>5'-CACTACTGCTGCTGCCAATT-3'               |

| Gene name (human) | Realtime RT-PCR Primer Sequences                           |
|-------------------|------------------------------------------------------------|
| WNT5a             | 5'-CGTCTGGAAGCAGACGTTTC-3'<br>5'-TCACGCCTCCTGATCTCC-3'     |
| ROR1              | 5'-GCAAGGGGAAATAGAAAATCAG-3'<br>5'-GAAGGAATGGCGAACTGAGA-3' |
| ROR2              | 5'-CCCCTCATTAACCAGCACAA-3'<br>5'-TTCCAAACCGGTCCTCT-3'      |

| Gene name (mouse) | realtime RT-PCR Primer Sequences                                         |
|-------------------|--------------------------------------------------------------------------|
| Slfbp (SpB)       | 5'-AACCCACACCTCTGAGAAC-3'<br>5'-GTGCAGGCTGAGGCITGT-3'                    |
| Slfpc (SpC)       | 5'-GGTCCGTGATGGAGAGTCCAC-3'<br>5'-GATGAGAAGCGTTTGAGGT-3'                 |
| Abca3             | 5'-TGT GGC GAC TGA GAA CCT T-3'<br>5'-CAC TGA TGT CCG GTT CTG C-3'       |
| Aqp5              | 5'-CAGACCTCAGAGATTTGTGAAG-3'<br>5'- CAGAAATAAATAAGATGGCAC-3'             |
| Caveolin1 (Cav1)  | 5'-CCA GGG AAA CCT CCT CAG A-3'<br>5'-CCG GAT GGG AAC AGT GTA GA-3'      |
| Emp2              | 5'-AAG CAG GGA GAG AGG TTC GT-3'<br>5'-GCT CCG ATC ATG ACA CAC AG-3'     |
| Hopx              | 5'-ACCACGCTGTGCCTCATC-3'<br>5'-GCGCTGCTTAAACCATTTC-3'                    |
| Rage              | 5'-GTGTCGGGCAACTAACAGG-3'<br>5'-CTGGCTTCCAGGAATCTG-3'                    |
| Rtkn2             | 5'-TGIATGGCAACGTGTGCTG-3'<br>5'-CCAGACCTTTCTCTGTTTC-3'                   |
| Pdpu(T1a)         | 5'-CAGTGTGTCTGGGTTTTGG-3'<br>5'-TGGGGTCAACAATATCATCTTCA-3'               |
| Wnt5a             | 5'-TAA GCC CGG GAG TGG CTT TGG-3'<br>5'-GGG CGA AGG AGA AAA ACG TGG-3'   |
| Actc1             | 5'-CCTCTCTGGAGAAGAGCTATGA-3'<br>5'-AATGAAAGAGGGCTGGAGAG-3'               |
| Bmp2              | 5'-AGATCTGTACCGCAGGCACT-3'<br>5'-GTTCTCCACGGCTTCTTC-3'                   |
| Meox2             | 5'-AAT CTA GAC CTC ACT GAA AGA CAG G-3'<br>5'-CTT GCT GTC CCC CTT TGA-3' |
| Lum               | 5'-CAG CAA CAT TCC GGA TGA G-3'<br>5'-TCA TTG TGA GAT AAA CGC AGG T-3'   |
| Cyr61             | 5'-GGATCTGTGAAGTGCCTCT-3'<br>5'-CTGCATTTCTTGCCCTTTT-3'                   |
| Cnn1              | 5'-CGGCTTGTCTGTGAAGTAA-3'<br>5'-ACCCCTCAATCCACTCTCT-3'                   |
| Fgf18             | 5'-AGGACGGGGACAAGTATGC-3'<br>5'-GGACTTGACTCCCGAAGGT-3'                   |
| Tbp               | 5'-CAGCCAAGATTACGGTAGAT-3'<br>5'-CCAATGACTCCAATGACCCT-3'                 |
